# Supplementary material for: Hydrocarbon degradation strategy and pyoverdine production using the salt tolerant Antarctic bacterium Marinomonas sp. ef1.
Source: Royal Society of Chemistry journal article supplement (doi:10.1039/d3ra02536e), 2023-01-01
Supplement: d3ra02536e1.pdf [file d3ra02536e1.pdf]

## Supplementary materials

### Hydrocarbon degradation strategy and pyoverdine production using the salt tolerant Antarctic bacterium *Marinomonas* sp. efl.

Marco Zannotti<sup>1,4</sup>, Kesava Priyan Ramasamy<sup>2</sup>, Valentina Loggi<sup>1</sup>, Alberto Vassallo<sup>3</sup>, Sandra Pucciarelli<sup>3,4</sup>, and Rita Giovannetti<sup>1,4</sup>

<sup>1</sup>Chemistry Interdisciplinary Project, School of Science and Technology, Chemistry Division, University of Camerino, 62032 Camerino, Italy

<sup>2</sup>Department of Ecology and Environmental Science, Umeå University, Umeå, 901 87, Sweden

<sup>3</sup>School of Biosciences and Veterinary Medicine, Biosciences and Biotechnology Division, University of Camerino, 62032 Camerino, Italy

<sup>4</sup>IridES s.r.l., Via Via Gentile III da Varano n° 1, 62032, Camerino, Italy

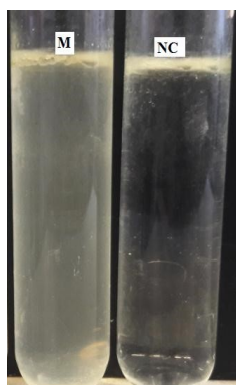

**Fig. S1** Growth of *Marinomonas* sp.efl (M) after five days in presence of 1% (v/v) commercial diesel oil as a carbon source. *Marinomonas* sp. efl growing in absence of diesel oil was used as negative control (NC).

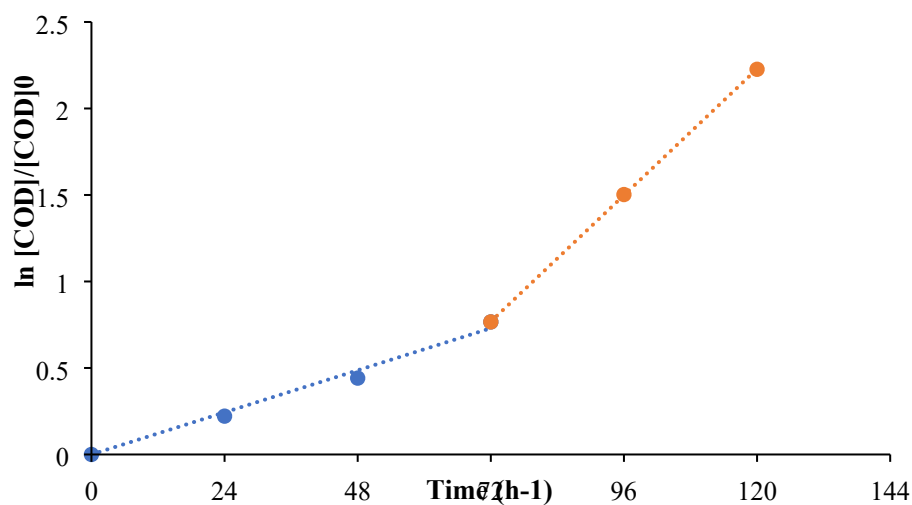

**Fig. S2** *Marinomonas* sp. efl cultures at 22°C in presence of 1%(v/v) of diesel: calculation of degradation kinetic constants by using first order kinetics.

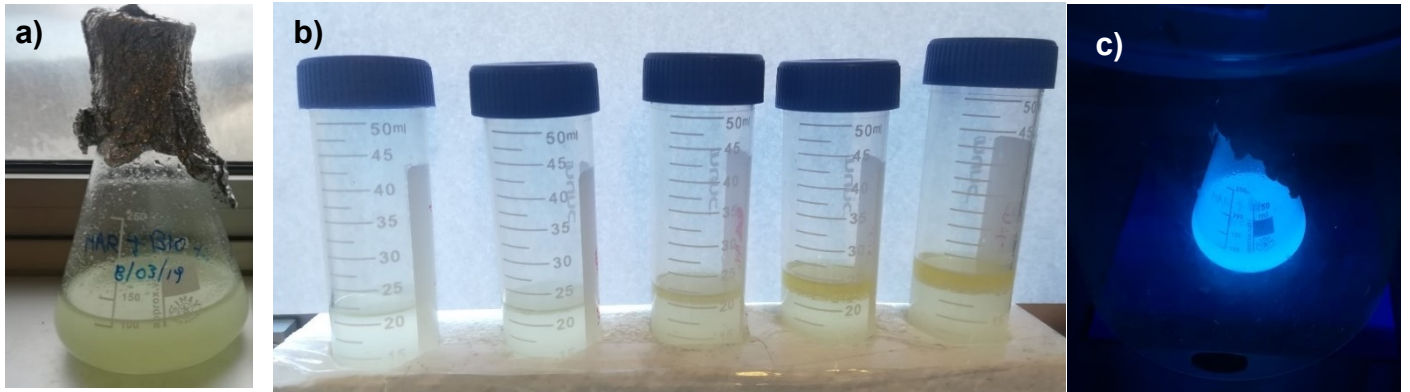

**Fig. S3** a) Yellow pigment produced during the growth of *Marinomonas* sp. efl in presence of 1% (v/v) biodiesel in SM b) Difference in colour as function of the added amount of biodiesel: from left to right, the amount of biodiesel was 1%, 4%, 8% 10% and 12% (v/v), respectively. C) *Marinomonas* sp. efl culture with biodiesel under Wood's Lamp.
